# Supplementary material for: Self-organization of calcium oxalate by flow-driven precipitation
Source: Royal Society of Chemistry journal article supplement (doi:10.1039/c4cc00205a), 2014-01-01
Supplement: c4cc00205a2.pdf [file c4cc00205a2.pdf]

# Electronic Supplementary Material

**File** caox.avi

**Title** Emerging precipitate pattern

**Legend** Calcium oxalate precipitate pattern emerges as a dense gravity current containing calcium ions spreads from the center inlet into sodium oxalate solution. The radial lines along which the precipitate accumulates results from the hydrodynamic instability at the tip of current. Field view: 21 cm x 18.5 cm, frame rate: 10 fps, acceleration rate: 30.

**Keywords** Precipitate pattern, self-organization, emergence of pattern, gravity current, hydrodynamic instability

**File** tip.avi

**Title** Growing tip of the precipitate

**Legend** Advancement of the gravity current showing the evolution of convection rolls at the tip that tends to accumulate the precipitate along radial lines. No significant precipitation occurs behind the front. Field view: 3.8 cm x 2.9 cm, frame rate: 10 fps, acceleration rate: 10.

**Keywords** Precipitate pattern, self-organization, emergence of pattern, gravity current, hydrodynamic instability
